# Supplementary material for: Giving a Hand: Synthetic Peptides Boost the Antifungal Activity of Itraconazole against Cryptococcus neoformans
Source: MDPI journal article supplement (doi:10.3390/antibiotics12020256), 2023-01-27
Supplement: s1 [file s1]

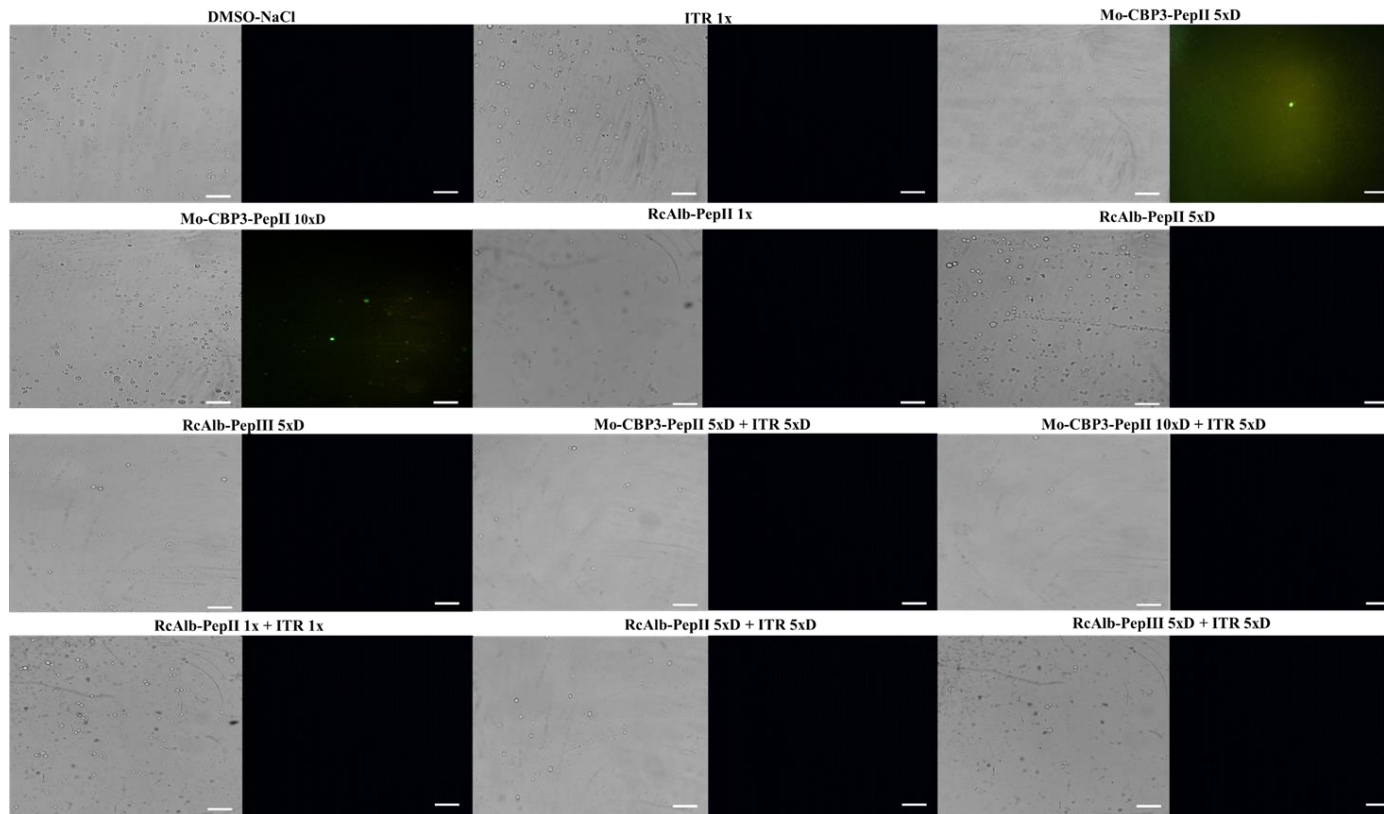

**Supplementary Figure S1.** Fluorescence images showing 3/7-mediated apoptosis on *C. neoformans* cells. Apoptosis was measured by CellEvent ki assay. Bars: 100  $\mu$ m; ITR: Itraconazole. 1x is the solution without dilution; 5xD is the solution 5-times diluted; 10xD is the solution 10-times diluted.
